1 Research article

2

3 **Elucidation of fibril structure responsible for swimming in**  
4 ***Spiroplasma* using electron microscopy**

5

6 Yuya Sasajima<sup>a</sup>, Takayuki Kato<sup>b</sup>, Tomoko Miyata<sup>c</sup>, Keiichi Namba<sup>c,d,e</sup> and Makoto  
7 Miyata<sup>a,f</sup>

8 <sup>a</sup>Graduate School of Science, Osaka City University, Osaka, 558-8585, Japan,

9 <sup>b</sup>Institute for Protein Research, Osaka University, 3-2 Yamadaoka, Suita, Osaka,  
10 565-0871, Japan, <sup>c</sup>Graduate School of Frontier Biosciences, Osaka University, 1-  
11 3 Yamadaoka, Suita, Osaka, 565-0871, Japan, <sup>d</sup>RIKEN Center for Biosystems  
12 Dynamics Research and SPring-8 Center, 1-3 Yamadaoka, Suita, Osaka, 565-  
13 0871, Japan, <sup>e</sup>JEOL YOKOGUSHI Research Alliance Laboratories, Osaka  
14 University, 1-3 Yamadaoka, Suita, Osaka, 565-0871, Japan, <sup>f</sup>The OCU  
15 Advanced Research Institute for Natural Science and Technology (OCARINA),  
16 Osaka City University, Osaka, 558-8585, Japan.

17 Address correspondence to Makoto Miyata, [miyata@sci.osaka-cu.ac.jp](mailto:miyata@sci.osaka-cu.ac.jp)

18 **Author Contributions:** YS and MM designed the research. YS performed the  
19 research. TK, TM, and KN provided techniques for structural analyses. YS, KN,  
20 and MM wrote the paper. All authors discussed and checked the entire  
21 manuscript.

22 **Competing Interest Statement:** The authors have no competing interests to  
23 declare.

24 **Classification:** Major class: Biological Science. Minor class: Microbiology;  
25 Biophysics and Computational Biology.

26 **Keywords:** Single particle analysis, Helical shape, Motility, Cytoskeleton,  
27 Filament.

28

## 29 **Abstract**

30 *Spiroplasma*, known pathogens of arthropods and plants, are helical-shaped  
31 bacteria lacking the peptidoglycan layer. They swim by alternating between left-  
32 and right-handed cell helicity, which is driven by an internal structure called the  
33 ribbon. This system is unrelated to flagellar motility that is widespread in bacteria.  
34 The ribbon comprises the bacterial actin homolog MreB and fibril, the protein  
35 specific to *Spiroplasma*. Here, we isolated the ribbon and its core, the fibril  
36 filament, and using electron microscopy, found that the helicity of the ribbon and  
37 the cell is linked to the helicity of the fibril. Single particle analysis using the  
38 negative-staining method revealed that the three-dimensional structures of the  
39 fibril filament comprise a repeated ring structure twisting along the filament axis.  
40 Based on these observations, we propose a scheme for the helicity-switching  
41 mechanism in which the twists caused by the conformational changes in the fibril  
42 filament are accumulated, transmitted to the ribbon, and then propel the cells by  
43 rotating the cell body like a screw.

44

## 45 **Significance Statement**

46 *Spiroplasma* are widespread globally as pathogens of animals and plants. They  
47 are also recognized as male-killing bacteria of insects. Their special swimming  
48 mechanism is caused by helicity switching, which could be the simplest  
49 swimming mechanism. This mechanism has attracted research attention for  
50 many years because of the possible application in the field of nano actuators;  
51 however, the details of this mechanism remain to be clarified. Here, we reveal  
52 the outline of the swimming mechanism by analyzing the structure of the core of  
53 the *Spiroplasma* ribbon.

54

## 55 **Introduction**

56 Mollicutes, which are parasitic or commensal bacteria, have evolved from the  
57 phylum Firmicutes that includes *Bacillus* and *Clostridium* by reducing their  
58 genome sizes (1). In the course of evolution, the cells have become softer and  
59 smaller owing to the loss of the peptidoglycan layer, allowing them to transmit  
60 their internal housekeeping activities to the outside, resulting in the acquisition of  
61 three unique motility mechanisms (1). Two of the three, represented by  
62 *Mycoplasma mobile* and *Mycoplasma pneumoniae*, exhibit gliding motilities on  
63 solid surfaces in which leg structures repeatedly catch sialylated  
64 oligosaccharides on host cells, based on two different mechanisms (2-4). The  
65 other motility system is the helicity-switching swimming of *Spiroplasma*, the  
66 subject of the present study (Movie\_S1) (2, 5-7). *Spiroplasma* species are

67 parasitic to plants and arthropods, and are characterized as polarized helical-  
68 shaped cells with a tapered end (8, 9). They also show obvious chemotaxis  
69 despite the absence of genes for the two-component regulatory system in the  
70 genome, which is generally responsible for bacterial chemotaxis (10). In general,  
71 swimming bacteria such as *Escherichia coli*, *Salmonella*, and spirochetes can  
72 migrate by the rotational motion of the flagellar motor fixed to the peptidoglycan  
73 layer, whereas *Spiroplasma* have a unique swimming system in which kinks  
74 propagate along the cell body with a switch between left-handed and right-  
75 handed cell helicity (Fig. 1A). This swimming is driven by an intracellular  
76 structure called the “ribbon” which localizes along the innermost line of the helical  
77 cell structure, and structural changes in the ribbon may switch the cell helicity  
78 (11, 12). Therefore, the detailed structure of the ribbon should be elucidated to  
79 determine this swimming mechanism.

80 In previous studies using electron microscopy, two types of filaments in the  
81 ribbon were visualized (11, 12). One comprises a protein “fibril,” specific to  
82 *Spiroplasma*. The other is possibly MreB, the bacterial actin homolog (10-12). As  
83 *Spiroplasma* MreBs are distantly located from other MreBs in the phylogenetic  
84 tree, here, we use the term SMreB (13, 14). Fibril protein has been studied as a  
85 linear motor protein which is responsible for the helicity-switching (15, 16). The  
86 fibril filament is considered to function as a chain of elliptical rings. However, the  
87 structure and function of the fibril protein remains unclear.

88 In the present study, we clarified the structure of the fibril filament, which is  
89 unrelated to that of any other known cytoskeletal filament, using electron  
90 microscopy (EM) and single particle analysis. Then, we proposed a scheme for  
91 the helicity-switching swimming of *Spiroplasma*.

92

## 93 **Results**

### 94 **Cell helicity is derived from the internal ribbon structure**

95 To clarify which structure forms the helical cell morphology of *Spiroplasma*, we  
96 first measured the helical pitches of the swimming cells using optical microscopy.  
97 The helical shape of the cells can be observed as a series of density segments in  
98 the defocused image plane, relative to the cell axis under phase contrast  
99 microscopy (Fig. 1B). The helical pitches between the left- and right-handed  
100 segments along the cell axis were  $696 \pm 32$  (n = 159) and  $697 \pm 37$  nm (n = 146),  
101 respectively. Next, we performed EM to analyze the internal ribbon structure to  
102 compare the helical pitches of the cells and the ribbons. The cells were bound to  
103 EM grids non-specifically, chemically fixed by glutaraldehyde, and then stained

104 with uranyl acetate. Negative-staining EM showed the images of helical-shaped  
105 cells with a narrow tip at one side (Fig. 1C). Next, we exposed the internal ribbon  
106 structure by treating the cells with 0.1% Triton X-100 on the grid (Fig. 1D). The  
107 ribbon showed a “spiral” flat structure comprising protofilaments. However,  
108 generally, in negative-staining EM, the specimens are placed in vacuum and  
109 dried and can result in distortions, which is disadvantageous for helix  
110 observation. Therefore, we applied quick-freeze, deep-etch (QFDE) EM to  
111 visualize the structure as close to the original as possible. In QFDE, a sample is  
112 frozen in milliseconds, exposed by fracturing and etching, and then a platinum  
113 replica is made by shadowing. The observation of the replica by transmission EM  
114 gives subnanometer resolution images with high contrast (17, 18). The cells were  
115 non-specifically bound to mica flakes and fixed by quick freezing in a liquid  
116 condition. Then, we prepared replicas by fracturing and platinum coating. QFDE-  
117 EM showed cell morphology consistent with the results from negative-staining  
118 EM (Fig. 1E). Using QFDE-EM, we also observed the ribbon exposed with 0.1%  
119 Triton X-100 treatment (Fig. 1F). The ribbon showed the “helicoid” structure in  
120 which the twisted positions were aligned in a line. When the cells were starved in  
121 phosphate-buffered saline (PBS) without glucose for 30 min, they all showed a  
122 left helix with the same pitch. Therefore, we assumed that this structure is the  
123 default state of the cell. Table 1 summarizes parameters that present the helicity  
124 of cells and ribbons obtained with the two EM methods (Fig. 1G, H). The helical  
125 pitches of the cells and the ribbons were in good agreement, indicating that the  
126 ribbon forms the cell helicity. As the helix diameter of the ribbon was one-third  
127 that of the cell helix, the ribbon should be localized along the innermost line of  
128 the cell helix.

### 129 **Characterization of the isolated ribbon**

130 We intended to use A22, an inhibitor of MreB polymerization to examine the role  
131 of MreBs in the ribbon (Fig. 2A) (19), because the binding of A22 to SMreBs has  
132 been suggested from amino acid sequences (13). First, we examined the effect  
133 of 1 mM A22 on swimming *Spiroplasma* cells (Movie\_S2). The cells shifted to a  
134 right-handed helix form and stopped moving in 2 min (Fig. 2B a, b), suggesting  
135 that the functions of SMreBs are also inhibited by A22. The resulting helical  
136 pitches of the cells were distributed around a peak at  $426 \pm 47$  nm, shorter than  
137 the original (Fig. 2B c).

138 The cell suspension was treated with 1% Triton X-100 and subjected to stepwise  
139 gradient centrifugation, consisting of 0%, 20%, 30%, 40%, 50%, and 60%  
140 sucrose layers. After centrifugation, we found a dense layer of cell contents at  
141 the bottom of the 40% sucrose layer. We recovered and observed the fraction

142 under EM and found that the ribbon comprised protofilaments with a width of 66  
143  $\pm$  12 nm and length longer than 2  $\mu$ m (Fig. 2C a). The ribbons were twisted with a  
144 pitch of 350  $\pm$  17 nm ( $n = 47$ ) (Fig. 2D a) consistent with the helical pitches of the  
145 cells and the ribbons prepared on the grid (Fig. 1, Table 1) ( $P = 0.7 > 0.01$ ). To  
146 analyze the number and width of the protofilaments involved in the isolated  
147 ribbon, we traced a sectional image profile of the ribbon (Fig. 2D b). Six to nine  
148 protofilaments were detected with widths ranging between 4–16 nm (Fig. 2D c, d  
149 and Fig. S1). SDS-PAGE analysis of this fraction showed five protein bands  
150 including six proteins (Table 2). The band (v) contained SMreBs 2 and 4. The  
151 whole ribbon fraction mainly comprised fibril protein and the SMreBs 2 and 4 with  
152 an intensity ratio of 47% and 37%, respectively (Fig. 2E).

153 Next, we examined the effects of A22 on the ribbon. We kept cells in 1 mM A22  
154 for 2.5 h at 30 °C and observed the ribbon. The ribbons were observed in a  
155 dispersed form with width distribution characterized by three peaks, 9.5, 15.0,  
156 and 22.2 nm (Fig. 2C c, D d). SDS-PAGE analysis clarified the content as 67%  
157 and 11% for fibril and SMreB proteins, respectively (Fig. 2E), suggesting that the  
158 protofilaments comprising fibril protein are bundled by SMreBs in the ribbon  
159 structure.

### 160 **Helical pitch of the isolated fibril filament**

161 To analyze the detailed structure, we treated the ribbon fraction with cholic acid  
162 and isolated the fibril protein using sucrose-gradient centrifugation. SDS-PAGE  
163 analysis showed that the fraction contains only fibril protein (Fig. 3A). We  
164 examined the ATPase activity of fibril protein by monitoring phosphate release  
165 because we expect ATP as the direct energy source for *Spiroplasma* swimming.  
166 Fibril protein at 17  $\mu$ M was mixed with 2 mM ATP in the presence of Mg ions, but  
167 phosphate was not released even after 250 min at 30 °C. Then, we concluded  
168 that the fibril protein does not have the obvious ATPase activity. Negative-  
169 staining EM showed that the fibril protein forms filaments which include single-  
170 and double-stranded filaments and bundles, suggesting various types of  
171 interactions between fibril protein molecules (Fig. 3B a). A single-stranded fibril  
172 filament consisted of repeated ring units approximately 10 nm long (Fig. 3B b)  
173 and 7 nm wide as observed in the side view (Fig. 3B c). A double-stranded fibril  
174 filament appeared to be formed by aligning two single-stranded filaments to face  
175 each other at the side of the ring, resulting in a thickness and width of 14 nm and  
176 7 nm, respectively (Fig. 3B d), forming a 10 nm long repeating structure. We  
177 analyzed the helical pitches for the double-stranded fibril filaments, because the  
178 double-stranded fibril filament had enough persistent length to cover the helical  
179 pitch with a clear twist of the ring pattern along the filament axis. The images of

180 the fibril filament cropped from the electron micrographs using the straightening  
181 selection tool of ImageJ software were subjected to a fast Fourier transform  
182 (FFT) to remove noise, and then, the generated image was subjected to an  
183 inverse FFT (Fig. 3C). To ensure that the FFT images did not include artificial  
184 mistakes, we also generated the two-dimensional (2D) averaged images from  
185 312 randomly picked particles with a box size of 45 nm along the filament axis  
186 using RELION 3.0 software (Fig. 3D)(20). The three classes of images  
187 corresponded well to different positions of the filament images generated by FFT,  
188 suggesting that the FFT images reflect the original structures. The helical pitch  
189 estimated from the FFT images was  $343 \pm 22$  nm ( $n = 158$ ) (Fig. 3G a). However,  
190 we could not conclude the handedness of the fibril filament, because the  
191 alignment of the filament on the EM grid was not distinguishable with negative-  
192 staining EM. Therefore, we analyzed the isolated fibril filament using QFDE-EM  
193 (Fig. 3F) because the replica is made by platinum, which is not transparent to an  
194 electron beam. We succeeded in the determination of their handedness (Fig. 3F)  
195 and concluded that the double-stranded fibril filament forms a left-handed helix  
196 with a pitch distribution of  $351 \pm 33$  nm ( $n = 50$ ) (Fig. 3G b). The helix features  
197 were consistent with the pitch of the cell in the default state and that of the  
198 isolated ribbon (Table 1), suggesting that the fibril pitch is the determinant for the  
199 pitch of the ribbon and cell.

### 200 **Three-dimensional reconstruction of fibril filaments**

201 To detect the conformational changes in the fibril three dimensionally, we  
202 performed single particle analysis based on negative-staining EM. The double-  
203 stranded fibril filament was not suitable for image averaging owing to the  
204 positional variety in the binding of the two filaments (Fig. 3 and Fig. S2).  
205 Therefore, we sonicated the purified fibril fraction to increase the proportion of  
206 single-stranded forms and succeeded in the acquisition of single-stranded  
207 images (Fig. 4A). From the selected 11 867 particles with good quality, the 2D-  
208 averaged images were summarized into three types (i), (ii), and (iii) (Fig. 4A b).  
209 Then, the initial 3D model was reconstructed using the *ab-initio* 3D function of  
210 cisTEM software (21) and used as the reference for the following 3D  
211 classification (Fig. 4A c). Three dimensional structures of the fibril filament  
212 reconstructed from the total of 11 867 particles by RELION 3.0 software showed  
213 three conformations, i.e., class 1: left-handed mostly straight (49%), class 2: left-  
214 handed with curvature (24%), and class 3: right-handed with curvature (27%)  
215 (Fig. 4A d and Fig. S3). Two dimensional re-projections from these three  
216 structures corresponded well to the 2D class averages, indicating the validity of  
217 the obtained 3D structures (Fig. S4). The 3D structure of the fibril filament had  
218 repeating elliptical rings with a pitch of 8.7 nm along the filament axis, with long

219 and short axes of 11 and 6 nm, respectively. A short cylinder connects the ring  
220 units causing a positive curvature (Fig. 4A d). These characteristics were  
221 common to all three classes. Cross-sectional images perpendicular to the  
222 longitudinal axis of the filament showed a “boomerang-like shape”, which had a  
223 dent at one side and protrusion at the other (Fig. 4B). We evaluated the twist of  
224 the fibril filament around the filament axis by measuring the directions of the  
225 Feret diameter, the longest diagonal line of cross-sectional images. Fibril  
226 filaments twisted along the filament axis. The twisting angles were estimated  
227 from the angle averages of the first and fourth units, as 4.8 (left-handed), 7.6  
228 (left-handed), and 5.9 (right-handed) degrees for classes 1, 2, and 3,  
229 respectively. Although superimposition of classes 2 and 3 showed diagonal shifts  
230 between these two conformations, the positions responsible for the structural  
231 shift could not be identified owing to the low resolution of structures (Fig. 4C). We  
232 constructed long filament models representing a helical pitch by stacking the ring  
233 units (Fig. 4D). Class 1 formed a left-handed helix with a diameter of 280 nm and  
234 a pitch of 530 nm. Class 2 formed the left-handed helix with a diameter of 110  
235 nm and a pitch of 210 nm. Class 3 formed the right-handed helix with a diameter  
236 of 110 nm and a pitch of 310 nm. We attempted to reconstruct the double  
237 stranded filaments through image averaging and failed (Fig. S2). It is likely  
238 caused by the variation in binding positions in the formation of the double strand.  
239 We reconstructed the double strand from the structure of the single-stranded  
240 filament (Fig 3E), which was consistent with the images obtained using the other  
241 methods.

#### 242 **Assignment of the predicted fibril protein structure to a density map**

243 To predict the fibril structure, we searched for template structures for homology  
244 modeling using SWISS-MODEL and obtained the methylthioadenosine/S-  
245 adenosylhomocysteine (MTA/SAH) nucleosidase of *Bacillus anthracis* (PDB ID:  
246 4QEZ) (22), which has a 25.6% amino acid sequence identity to the N-terminal  
247 region amino acid residues 1–228 of the fibril protein. In contrast, the sequence  
248 of the C-terminal region of amino acids 229–512 did not show significant  
249 homology with other proteins in the BLAST search using non-redundant protein  
250 sequences (searched on December 24, 2020). These results are consistent with  
251 a previous observation in 2011 (15). Then, we assumed that the fibril protein can  
252 be divided into the N-terminal domain, comprising amino acid residues 1–228  
253 and the remaining portion. Secondary-structure prediction based on the amino  
254 acid sequences showed similarity between the N-terminal domain of the fibril  
255 protein and *B. anthracis* MTA/SAH nucleosidase (Fig. 5A), suggesting the  
256 similarity also in 3D structures. Therefore, we used *B. anthracis* MTA/SAH  
257 nucleosidase as a template for the homology modeling of the N-terminal region

258 of the fibril protein using SWISS-MODEL. The predicted model showed a  
259 homodimer in which the monomers interact with each other to occlude a  
260 hydrophobic surface, as observed in the crystal structure of *B. anthracis*  
261 MTA/SAH nucleosidase (Fig. 5B). The predicted rod-shaped dimer had  
262 dimensions of 75, 60, and 50 Å. We then manually searched for the position in  
263 the density map from EM to assign the predicted molecular model (Fig. 5C). The  
264 predicted rod structure could be assigned to only one position, because it was  
265 too thick to assign to the other positions. The gap between the two subunits of  
266 the predicted structure fit to a gap observed in the density map from EM. Based  
267 on these results, we determined the alignment of the subunits in the  
268 protofilament (Fig. 5D).

269

## 270 Discussion

271

### 272 Fibril and ribbon structures

273 Although the interconnected ring structure in the fibril filament has been observed  
274 (10, 15), the 3D reconstruction of the fibril has not been achieved to date. In the  
275 present study, we clarified the 3D structure of the fibril filament for the first time.  
276 The sonication in the isolation process was effective in isolating the single  
277 stranded filament, whose uniform structure was advantageous for image  
278 averaging (Fig. 4). The structure determined here showed a width of 10.5 nm,  
279 and was in good agreement with the corresponding filament structure obtained  
280 through electron cryotomography (12), suggesting that the filaments isolated  
281 here retained the original structure. The left-handed conformation accounted for  
282 73% of the fibril filament, suggesting that this conformation is more stable than  
283 others. This observation may explain the fact that both the cells in a default state  
284 and the isolated ribbons were mostly left-handed (23, 24). The fibril structure is  
285 likely more stable in the left-handed conformation than in the right-handed one.  
286 The fibril filament did not show any polarity along the filament axis, although  
287 *Spiroplasma* cells swim in a directed manner (Fig. 1) (5, 10). This directionality  
288 could be caused by structures other than the fibril, for example, SMreB proteins  
289 and the dumbbell formed at the cell front (10, 14, 25). We obtained three different  
290 filament conformations with different curvatures, in other words, the helix  
291 diameter. This variety in curvature may function in directing the ribbon formation,  
292 in which the filament at the ribbon edges requires a longer helix diameter than  
293 those at the central positions (Fig. 6).

### 294 Swimming mechanism

295 Based on these results, we can now suggest the core part of the helicity-



296 switching mechanism (Fig. 6). The ribbon comprises 6–9 fibril filaments  
297 connected laterally and oriented along the innermost part of the helical cell (Fig.  
298 6A). The fibril should support the cell membrane through their ring structures,  
299 because the fibril filament has a positive curvature toward the backbone (Fig. 6B  
300 a upper). Thus, the fibril twist forms the twist of the ribbon and the cell with the  
301 same handedness, because the fibril filament binds to the adjacent filaments  
302 through their fixed positions (Fig. 6B a lower). If the fibril filaments in the ribbon  
303 have strong cooperativity along the ribbon axis and transmit the twist to the next  
304 levels, the helicity shift travels along the ribbon axis, with accumulation of the  
305 rotational angle (Fig. 6B b) (23). If we assume that such a ribbon is fixed at a tip  
306 on the front end, then, the shift initiated at the tip travels backward, along with  
307 rotation of the back portion to release the torsion, in a direction that pushes water  
308 backward (Fig. 6C) (Movie\_S1). The ribbon structure drives the cell structure and  
309 propels the cell forward by pushing water backward like a screw.

### 310 **Possible molecular mechanism for helicity-switching**

311 The N-terminal region of the fibril protein has an amino acid sequence identity of  
312 as much as 25.6% with MTA/SAH nucleosidase from a bacterial species, *B.*  
313 *anthracis*. This protein is essential for bacterial growth because it recycles  
314 adenine and methionine through S-adenosylmethionine (SAM)-mediated  
315 methylation reactions and produces the universal quorum-sensing signal,  
316 autoinducer-2 (AI-2) (26). The fibril protein probably evolved from this protein,  
317 which is abundant in a cell, by acquiring a C-terminal region possessing  
318 polymerization activity. Class Mollicutes lack the respiration pathway to generate  
319 membrane potential and produce ATP through glycolysis and arginine  
320 fermentation (27). Therefore, the energy for swimming should also be supplied  
321 by ATP, rather than the membrane potential, because the energy required for  
322 growth is supplied by ATP, which is produced by glycolysis in *Spiroplasma*. In  
323 fact, the two motility mechanisms of Mollicutes genus, *Mycoplasma mobile*-type  
324 and *Mycoplasma pneumoniae*-type gliding mechanisms depend on the hydrolytic  
325 energy of ATP (28-31). The fibril protein derived from the MTA/SAH nucleosidase  
326 is unlikely to have ATPase activity, and no ATPase activity was detected in the  
327 fibril fraction. These facts suggest that other proteins may be involved in the  
328 helicity switching (12, 14, 32). The ribbon contains SMreB proteins, and  
329 interestingly, most genomes of the *Spiroplasma* code for five classes of SMreBs  
330 (13, 14, 33). Moreover, in the present study, we showed that SMreBs have roles  
331 to bundle fibril filaments (Fig. 2 C). Generally, MreBs exhibit polymerization  
332 dynamics based on ATP hydrolysis, and function to assign peptidoglycan  
333 synthesizing complexes (1, 17, 19, 34) and as a rail for the gliding motor of  
334 *Myxococcus xanthus* (35). SMreB5, a member in the five classes, is known to be

335 essential for helix formation and swimming of *Spiroplasma citri* cells (14). These  
336 facts suggest that SMreBs support and drive the helices formed by the fibril.  
337 Perhaps, SMreB itself also forms filamentous structures along the cell axis (11,  
338 12). In fact, MreB-like filaments have been observed along the cell axis by EM  
339 analyses of *Spiroplasma melliferum* (12).

340

341

## 342 **Materials and Methods**

343

### 344 **Bacterial strains and culture conditions**

345 The type strain, TDA-040725-5<sup>T</sup>, of *Spiroplasma eriocheiris* was cultured in R2  
346 medium (2.5% [wt/vol] heart infusion broth, 8% sucrose, and 10% horse serum)  
347 at 30 °C to an optical density of 0.06 to 0.1 at 600 nm (10, 36).

### 348 **Optical microscopy**

349 Cultured cells were centrifuged at 11 000 × *g*, 10 °C for 10 min and suspended in  
350 PBS consisting of 75 mM sodium phosphate [pH 7.3], 100 mM NaCl, containing  
351 20 mM glucose and 0.6% methylcellulose to be of a cell density 10-fold higher  
352 than that of the original (10, 36). The cells were inserted into a tunnel chamber  
353 assembled by taping coverslips as previously described and observed under an  
354 IX71 microscope (Olympus, Tokyo, Japan) (37). The video was captured using a  
355 DMK33UX174 complementary metal–oxide–semiconductor (CMOS) camera  
356 (The Imaging Source, Taipei, Taiwan) and analyzed using ImageJ v1.53a  
357 (<https://imagej.nih.gov/ij/>).

### 358 **Electron microscopy**

359 To observe the intact cells, the cell suspension was placed on a hydrophilized  
360 grid, fixed using 2% glutaraldehyde, washed with water, and stained with 2%  
361 uranyl acetate. To observe the internal structure, the cell suspension on a grid  
362 was treated with PBS including 0.1 mg/mL DNase and 1 mM MgCl<sub>2</sub> for 20 s, and  
363 washed and stained with 2% uranyl acetate. QFDE-EM was performed as  
364 previously reported for specimens suspended with mica flakes (17). The images  
365 were acquired using a JEM1010 EM (JEOL, Akishima, Japan) equipped with a  
366 FastScan-F214(T) charged-coupled device (CCD) camera (TVIPS, Gauting,  
367 Germany) and analyzed using ImageJ v1.53a.

### 368 **Isolation of ribbon and fibril**

369 To isolate the internal structure, 10 mL of cell suspension in PBS was treated  
370 with 1% Triton X-100, 0.1 mg/mL DNase, 1 mM MgCl<sub>2</sub>, and 0.1 mM PMSF with  
371 shaking for 10 min at 4 °C. The insoluble fraction was recovered by centrifugation

372 at 20 000 × *g*, 4 °C for 30 min and suspended in PBS to be 0.2 mL. The sample  
373 was laid at the top of sucrose solution layers of 0%, 20%, 30%, 40%, 50%, and  
374 60%, and centrifugated at 20 000 × *g*, 4 °C for 20 min in a 1.5 mL tube with a  
375 fixed angle. To isolate the fibril filament, the insoluble fraction was additionally  
376 treated with a solution consisting of 2% choric acid, 20 mM Tris-Cl pH 8.0, 150  
377 mM NaCl at 4 °C for 8 h and subjected to stepwise density gradient  
378 centrifugation.

### 379 **ATPase assay**

380 ATPase activity was assayed by a continuous spectrophotometric method using  
381 a 2-amino-6-mercapto-7-methylpurine ribonucleoside–purine nucleoside  
382 phosphorylase reaction to detect the released inorganic phosphate at 30 °C  
383 (EnzChek kit; Life Technologies, Carlsbad, CA, USA). The reaction mixture was  
384 as follows: 17 μM purified fibril filament, 1 mM MgCl<sub>2</sub>, 20 mM Tris-HCl (pH 7.5) in  
385 a total volume of 0.2 mL (38).

### 386 **Reconstitution of 3D structure**

387 The contrast transfer function (CTF) parameters for negative-staining EM images  
388 were estimated using Gctf25 software (39). The images of fibril filaments were  
389 selected automatically by RELION 3.0 (20) as helical objects and segmented as  
390 squares of 200 × 200 pixels with 90% overlap. These 14 543 images were 2D-  
391 classified and 11 867 images were selected for further analyses. *ab-initio*  
392 reconstitution was performed by cisTEM (21) based on segmented images from  
393 12 classes. The selected 11 867 particle images were 3D-classified using the 3D  
394 map in RELION 3.0 (20).

395

### 396 **Acknowledgments**

397 We thank Yuhei O Tahara, Daichi Takahashi, Hana Kiyama, and Ikuko Fujiwara  
398 at the Graduate School of Science, Osaka City University, Japan for helpful  
399 discussions. This study was supported by a Grants-in-Aid for Scientific Research  
400 A (MEXT KAKENHI, Grant Number JP17H01544), JST CREST (Grant Number  
401 JPMJCR19S5), the Osaka City University (OCU) Strategic Research Grant 2017  
402 for top priority researches to MM, and JSPS KAKENHI (Grant Number  
403 JP25000013), the Platform Project for Supporting Drug Discovery and Life  
404 Science Research (BINDS) from AMED (Grant Number JP19am0101117 and  
405 support number 1282), the Cyclic Innovation for Clinical Empowerment (CiCLE)  
406 from AMED (Grant Number JP17pc0101020), and JEOL YOKOGUSHI Research  
407 Alliance Laboratories of Osaka University to KN.  
408

## 409 References

- 410 1. Miyata M, *et al.* (2020) Tree of motility - A proposed history of motility  
411 systems in the tree of life. *Genes Cells* 25(1):6-21.
- 412 2. Miyata M & Hamaguchi T (2016) Integrated information and prospects for  
413 gliding mechanism of the pathogenic bacterium *Mycoplasma pneumoniae*.  
414 *Front Microbiol* 7:960.
- 415 3. Miyata M & Hamaguchi T (2016) Prospects for the gliding mechanism of  
416 *Mycoplasma mobile*. *Curr Opin Microbiol* 29:15-21.
- 417 4. Miyata M (2010) Unique centipede mechanism of *Mycoplasma* gliding. *Annu*  
418 *Rev Microbiol* 64:519-537.
- 419 5. Harne S, Gayathri P, & Beven L (2020) Exploring *Spiroplasma* biology:  
420 opportunities and challenges. *Front Microbiol* 11:589279.
- 421 6. Wada H & Netz RR (2009) Hydrodynamics of helical-shaped bacterial  
422 motility. *Phys Rev E Stat Nonlin Soft Matter Phys* 80(2 Pt 1):021921.
- 423 7. Shaevitz JW, Lee JY, & Fletcher DA (2005) *Spiroplasma* swim by a  
424 processive change in body helicity. *Cell* 122(6):941-945.
- 425 8. Harumoto T & Lemaitre B (2018) Male-killing toxin in a bacterial symbiont of  
426 *Drosophila*. *Nature* 557(7704):252-255.
- 427 9. Gasparich GE (2002) *Spiroplasmas*: evolution, adaptation and diversity.  
428 *Front Biosci* 7:d619-640.
- 429 10. Liu P, *et al.* (2017) Chemotaxis without conventional two-component system,  
430 based on cell polarity and aerobic conditions in helicity-switching swimming  
431 of *Spiroplasma eriocheiris*. *Front Microbiol* 8:58.
- 432 11. Trachtenberg S, *et al.* (2008) Structure of the cytoskeleton of *Spiroplasma*  
433 *melliferum* BC3 and its interactions with the cell membrane. *J Mol Biol*  
434 378(4):778-789.
- 435 12. Kurner J, Frangakis AS, & Baumeister W (2005) Cryo-electron tomography  
436 reveals the cytoskeletal structure of *Spiroplasma melliferum*. *Science*  
437 307(5708):436-438.
- 438 13. Takahashi D, Fujiwara I, & Miyata M (2020) Phylogenetic origin and  
439 sequence features of MreB from the wall-less swimming bacteria  
440 *Spiroplasma*. *Biochem Biophys Res Commun* 533(4):638-644.
- 441 14. Harne S, *et al.* (2020) MreB5 Is a determinant of rod-to-helical transition in  
442 the cell-wall-less bacterium *Spiroplasma*. *Curr Biol* 30(23):4753-4762.e4757.
- 443 15. Cohen-Krausz S, Cabahug PC, & Trachtenberg S (2011) The monomeric,  
444 tetrameric, and fibrillar organization of Fib: the dynamic building block of the  
445 bacterial linear motor of *Spiroplasma melliferum* BC3. *J Mol Biol* 410(2):194-  
446 213.
- 447 16. Townsend R, Archer DB, & Plaskitt KA (1980) Purification and preliminary  
448 characterization of *Spiroplasma* fibrils. *J Bacteriol* 142(2):694-700.
- 449 17. Tulum I, Tahara YO, & Miyata M (2019) Peptidoglycan layer and disruption  
450 processes in *Bacillus subtilis* cells visualized using quick-freeze, deep-etch  
451 electron microscopy. *Microscopy (Oxf)* 68(6):441-449.

- 452 18. Heuser JE (2014) Some personal and historical notes on the utility of "deep-  
453 etch" electron microscopy for making cell structure/function correlations. *Mol*  
454 *Biol Cell* 25(21):3273-3276.
- 455 19. Shi H, Bratton BP, Gitai Z, & Huang KC (2018) How to build a bacterial cell:  
456 MreB as the foreman of *E. coli* construction. *Cell* 172(6):1294-1305.
- 457 20. Zivanov J, *et al.* (2018) New tools for automated high-resolution cryo-EM  
458 structure determination in RELION-3. *Elife* 7:e42166.
- 459 21. Grant T, Rohou A, & Grigorieff N (2018) cisTEM, user-friendly software for  
460 single-particle image processing. *Elife* 7:e35383.
- 461 22. Lee JE, Cornell KA, Riscoe MK, & Howell PL (2001) Structure of *E. coli* 5'-  
462 methylthioadenosine/S-adenosylhomocysteine nucleosidase reveals  
463 similarity to the purine nucleoside phosphorylases. *Structure* 9(10):941-953.
- 464 23. Nakane D, Ito T, & Nishizaka T (2020) Coexistence of two chiral helices  
465 produces kink translation in *Spiroplasma* swimming. *J Bacteriol*  
466 202(8):e00735-00719.
- 467 24. Boudet JF, *et al.* (2018) Large variability in the motility of spiroplasmas in  
468 media of different viscosities. *Sci Rep* 8(1):17138.
- 469 25. Garnier M, Clerc M, & Bove JM (1984) Growth and division of *Spiroplasma*  
470 *citri*: elongation of elementary helices. *J Bacteriol* 158(1):23-28.
- 471 26. Parveen N & Cornell KA (2011) Methylthioadenosine/S-  
472 adenosylhomocysteine nucleosidase, a critical enzyme for bacterial  
473 metabolism. *Mol Microbiol* 79(1):7-20.
- 474 27. Fraser CM, *et al.* (1995) The minimal gene complement of *Mycoplasma*  
475 *genitalium*. *Science* 270(5235):397-403.
- 476 28. Mizutani M & Miyata M (2019) Behaviors and energy source of *Mycoplasma*  
477 *gallisepticum* gliding. *J Bacteriol* 201(19):e00397-00319.
- 478 29. Kinoshita Y, Miyata M, & Nishizaka T (2018) Linear motor driven-rotary motion  
479 of a membrane-permeabilized ghost in *Mycoplasma mobile*. *Sci Rep*  
480 8(1):11513.
- 481 30. Kinoshita Y, *et al.* (2014) Unitary step of gliding machinery in *Mycoplasma*  
482 *mobile*. *Proc Natl Acad Sci U S A* 111(23):8601-8606.
- 483 31. Uenoyama A & Miyata M (2005) Gliding ghosts of *Mycoplasma mobile*. *Proc*  
484 *Natl Acad Sci U S A* 102(36):12754-12758.
- 485 32. Trachtenberg S, Schuck P, Phillips TM, Andrews SB, & Leapman RD (2014)  
486 A structural framework for a near-minimal form of life: mass and  
487 compositional analysis of the helical mollicute *Spiroplasma melliferum* BC3.  
488 *PLoS One* 9(2):e87921.
- 489 33. Ku C, Lo WS, & Kuo CH (2014) Molecular evolution of the actin-like MreB  
490 protein gene family in wall-less bacteria. *Biochem Biophys Res Commun*  
491 446(4):927-932.
- 492 34. Egan AJF, Errington J, & Vollmer W (2020) Regulation of peptidoglycan  
493 synthesis and remodelling. *Nat Rev Microbiol* 18(8):446-460.
- 494 35. Fu G, *et al.* (2018) MotAB-like machinery drives the movement of MreB  
495 filaments during bacterial gliding motility. *Proc Natl Acad Sci U S A*  
496 115(10):2484-2489.

- 497 36. Terahara N, Tulum I, & Miyata M (2017) Transformation of crustacean  
498 pathogenic bacterium *Spiroplasma eriocheiris* and expression of yellow  
499 fluorescent protein. *Biochem Biophys Res Commun* 487(3):488-493.  
500 37. Uenoyama A, Kusumoto A, & Miyata M (2004) Identification of a 349-  
501 kilodalton protein (Gli349) responsible for cytoadherence and glass binding  
502 during gliding of *Mycoplasma mobile*. *J. Bacteriol.* 186:1537-1545.  
503 38. Nishikawa MS, *et al.* (2019) Refined mechanism of *Mycoplasma mobile*  
504 gliding based on structure, ATPase activity, and sialic acid binding of  
505 machinery. *mBio* 10(6):e02846-02819.  
506 39. Zhang K (2016) Gctf: Real-time CTF determination and correction. *J Struct*  
507 *Biol* 193(1):1-12.

508

509

510 **Table 1.** Dimensions of cell and ribbon

| Parameters                   | Negatively stained electron microscopy | Quick-freeze, deep-etch electron microscopy | Optical microscopy                   |
|------------------------------|----------------------------------------|---------------------------------------------|--------------------------------------|
| Cell thickness (a)           | 196 ± 26 nm                            | 179 ± 23 nm                                 |                                      |
| Ribbon width (b)             | 147 ± 24 nm                            | 118 ± 17 nm                                 |                                      |
| Cell helical pitch (c)       | 696 ± 73 nm                            | 706 ± 43 nm (LH)                            | 696 ± 32 nm (LH)<br>697 ± 37 nm (RH) |
| Ribbon 1/2 helical pitch (d) | 348 ± 44 nm                            | 350 ± 30 nm (LH)                            |                                      |
| Ribbon helical pitch (e)     | 684 ± 60 nm                            | 700 ± 60 nm (LH)                            |                                      |
| Ribbon helical diameter (f)  | 137 ± 30 nm                            | 118 ± 17 nm                                 |                                      |
| Cell helical diameter (g)    | 383 ± 45 nm                            | 310 ± 26 nm                                 |                                      |
| Isolated ribbon pitch        | 350 ± 17 nm                            |                                             |                                      |
| Isolated fibril pitch        | 343 ± 22 nm                            | 351 ± 34 nm (LH)                            |                                      |

\*, \*\*  $p > 0.05$  (the agreements between cell pitch and ribbon pitch were supported by Student's *t*-test)

511

512

513

514

515

**Table 2.** Protein components of isolated ribbon.

| Protein band | Gene ID              | Annotation           | MW (kDa)     | Density ratio (%) |             |
|--------------|----------------------|----------------------|--------------|-------------------|-------------|
|              |                      |                      |              | A22 untreated     | A22 treated |
| (i)          | SPE-1201             | Hypothetical protein | 85.8         | 4                 | 5           |
| (ii)         | SPE-0013             | FtsH                 | 77.0         | 12                | 17          |
| (iii)        | SPE-0666             | Fibril               | 58.7         | 47                | 67          |
| (iv)         | SPE-1231             | MreB5                | 38.5         | 10                | 7           |
| (v)          | SPE-1224<br>SPE-1230 | MreB2<br>MreB4       | 37.8<br>40.7 | 27                | 4           |

516

517



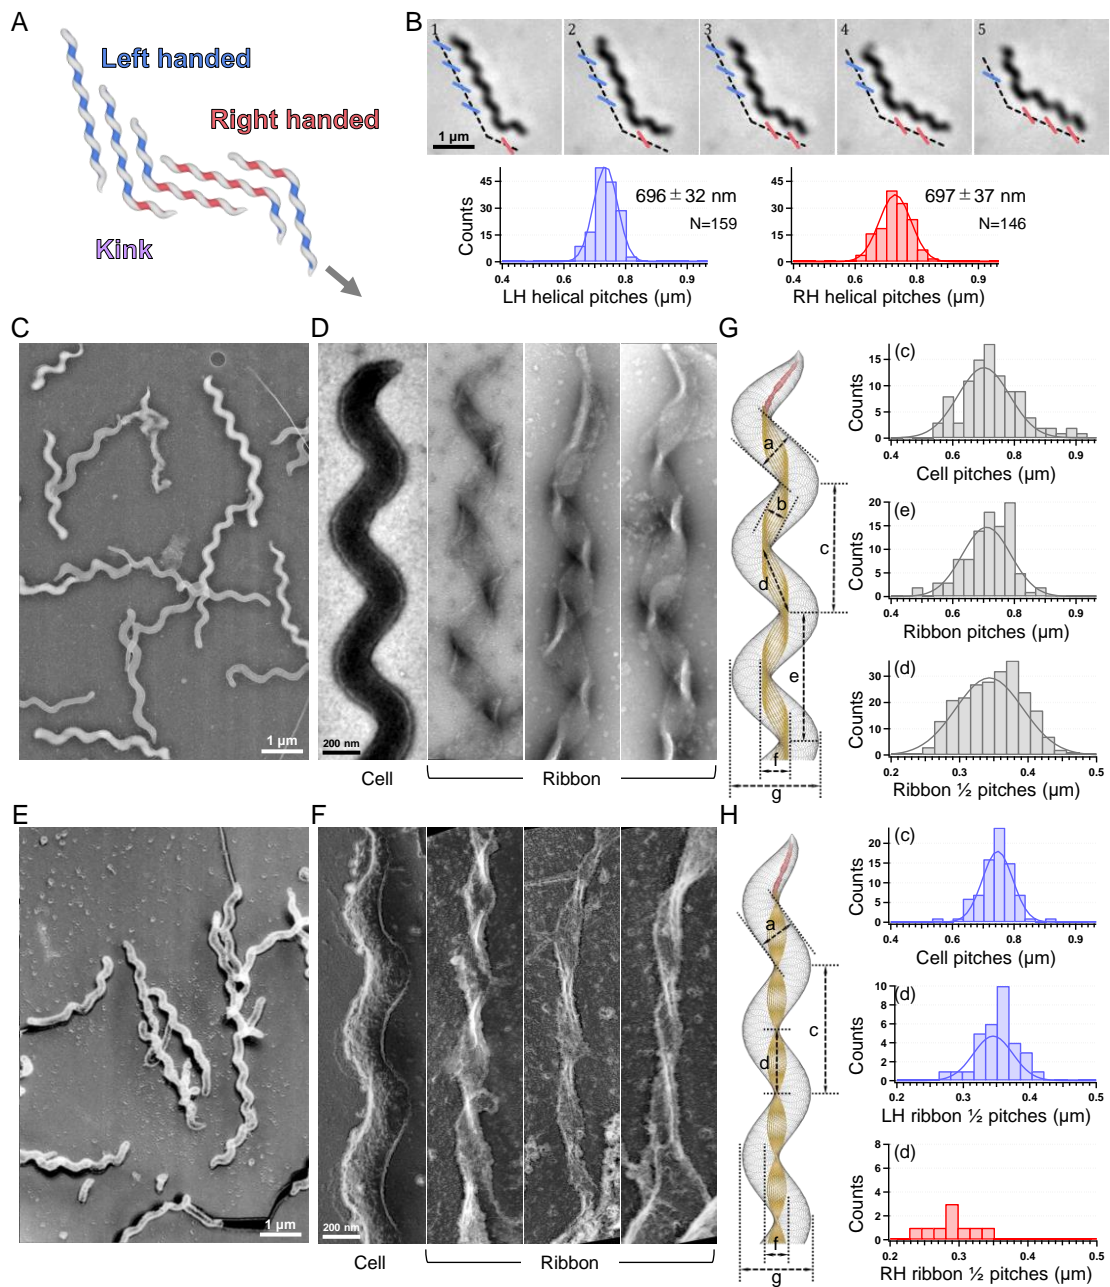

**Figure 1.** Cell helicity derived from the ribbon structure. (A) Schematic of helicity-switching swimming. The swimming direction is indicated by an arrow. (B) Phase-contrast microscopy of swimming cell. The blue and red segments indicate the left- and right-handed helicity, respectively (upper). Histograms of both left- and right-handed helical pitches of swimming cells, fitted by Gaussian curves with peak tops of  $696 \pm 32$  and  $697 \pm 37$  nm, respectively (lower). (C, E) Field image of cells acquired by negative-staining and quick-freeze, deep-etch (QFDE) electron microscopy (EM). (D, F) Intact cells (leftmost) and ribbons prepared on grids (others). (G, H) Dimensions marked in cell schematics (a)-(g) (left) are summarized in histograms (right) and Table 1.

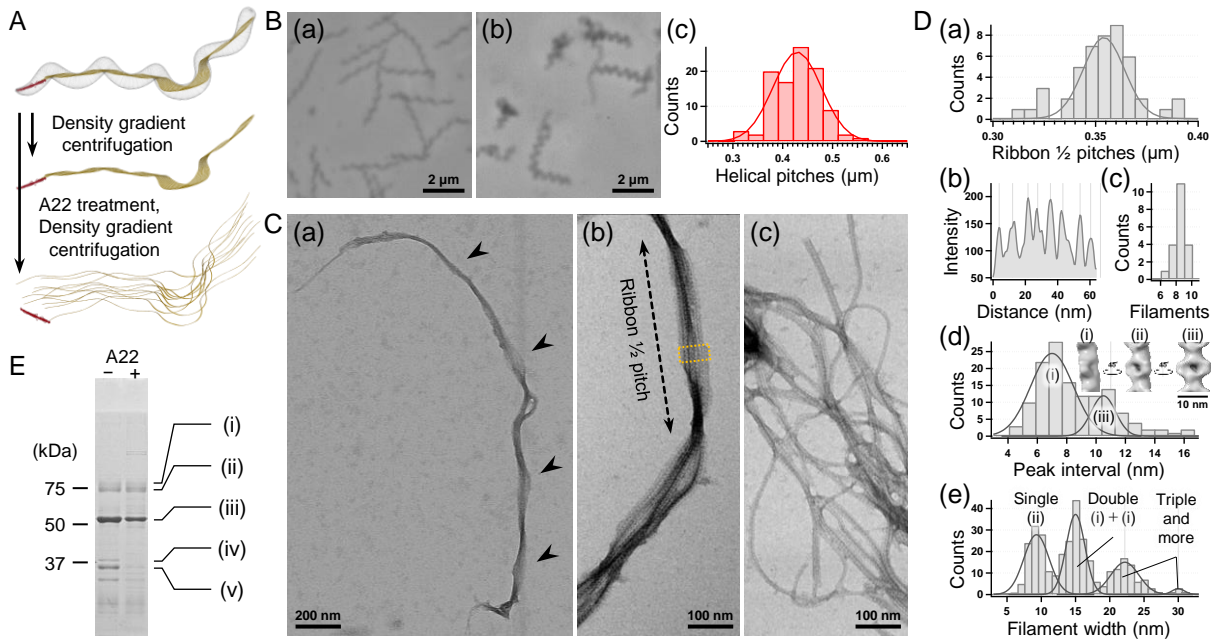

**Figure 2.** Isolation and characterization of ribbon. (A) Schematic for isolation and disassembly of ribbon. (B) Effects of A22 on swimming cells. (a) Untreated. (b) A22-treated for 2 min. (c) Histogram of the helical cell pitches after A22 treatment, fitted by a Gaussian curve with a peak at  $426 \pm 47$  nm. (C) Electron microscopy (EM) observation of isolated ribbon fractions. (a) The whole structure of the isolated ribbon with helicity as shown by periodical wide positions (marked by arrows). (b) The magnified image of the isolated ribbon and the helical pitch is indicated by a bidirectional arrow. (c) Disassembled ribbon comprising protofilaments. (D) Numerical characterization. (a) Histogram for the helical pitches of the isolated ribbon, fitted by a Gaussian curve with a peak at  $351 \pm 16$  nm. (b) Sectional image profile of the area boxed in panel (C-b). The peaks correspond to the center of the protofilament. (c) Histogram for the number of protofilaments involved in a ribbon. (d) Histogram for the protofilament width in ribbons. The distribution can be fitted by two Gaussian curves marked (i) and (ii), with peaks around 7.0 and 10.5 nm, respectively. (Inset) The images of the reconstituted structures viewed from different angles (refer to Fig. 4). (e) Histogram for the width of the protofilament in disassembled ribbons, fitted with three Gaussian curves with peak tops of 9.5, 15, 22.2, and 30.1 nm. (E) SDS-10% PAGE of the ribbon fraction isolated from original and A22-treated cells.

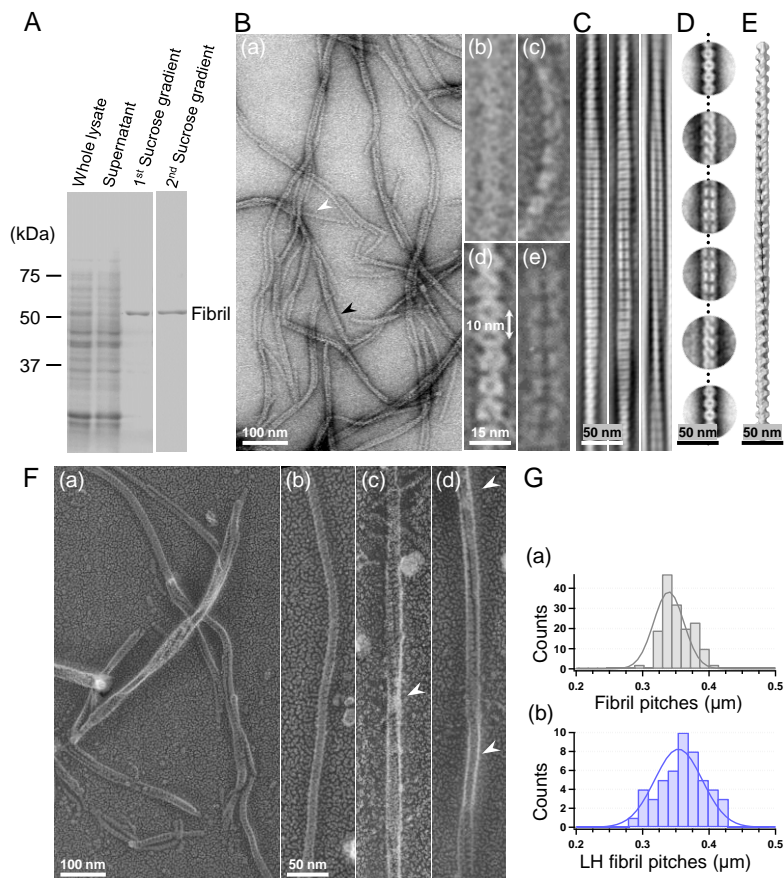

**Figure 3.** Helical pitches of the isolated fibril filament. (A) Protein profiles of fractions in purification process for fibril protein. (B) Purified fibril filaments observed by negative-staining electron microscopy (EM). (a) Field image. White and black arrows indicate single and double strands, respectively. (b, c) Front and side views of the single-stranded fibril filaments. (d, e) Front and side views of the double-stranded fibril filaments. (C) Double stranded filaments reconstituted through Fourier transformation. (D) Averaged images of double-stranded filaments reconstructed from 62, 11, and 23 images, respectively, for the topmost, second, and third panels. Repeated alignment of three images shown for comparison with panel (C). (E) Model for the double-stranded fibril filament (Refer to Fig. 4). (F) Fibril filaments observed by quick-freeze, deep-etch (QFDE)-EM. Field (a), single-stranded filament (b), and double-stranded filaments (c, d) are presented. (G) Histograms of the helical pitches for the fibril filaments measured for negative-staining (a) and QFDE (b) EM observations. Pitches were fitted by Gaussian curves with peaks at  $343 \pm 22$  and  $351 \pm 34$  nm.

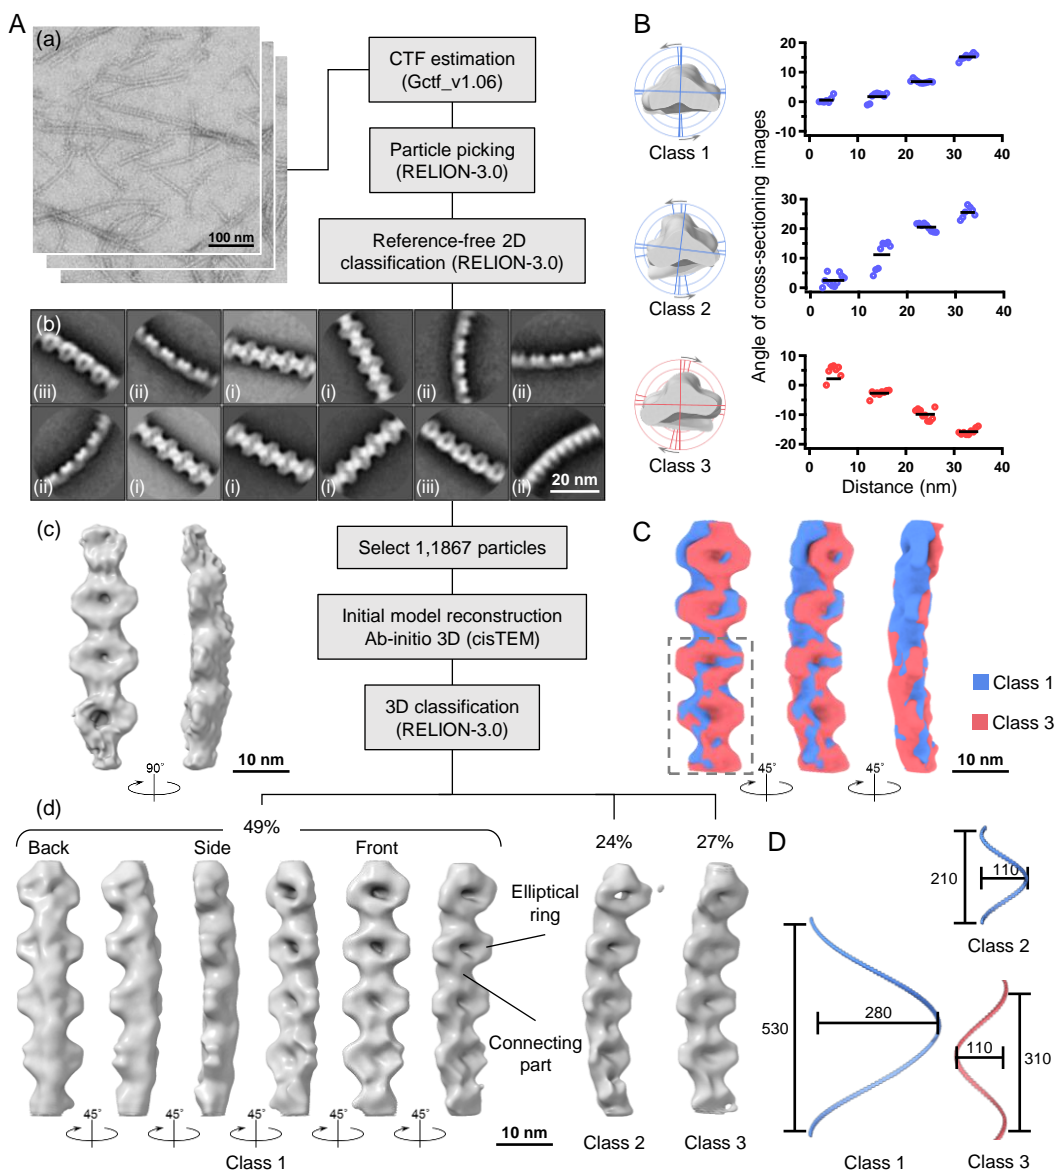

**Figure 4.** Three-dimensional reconstruction of fibril filaments. (A) Workflow of single particle analysis using negative-staining electron microscopy (EM). (a) Single-stranded fibril filaments prepared by sonication. (b) Averaged images by “2D classification.” (c) Initial 3D model generated by *ab-initio* reconstruction of cisTEM software. (d) Three different conformations of the fibril filament reconstituted by “3D classification.” (B) Rotation of repeated units along the filament axis. Ferret diameter angles for the cross-sectional images were plotted along the filament in positions with a Ferret diameter longer than 80% of the filament maximum (right). (C) Superimposition of class 1 (left-handed) and class 3 (right-handed) structures. The fitting reference is indicated by the dashed box. (D) Three types of fibril filament models showing 44 repeated units.

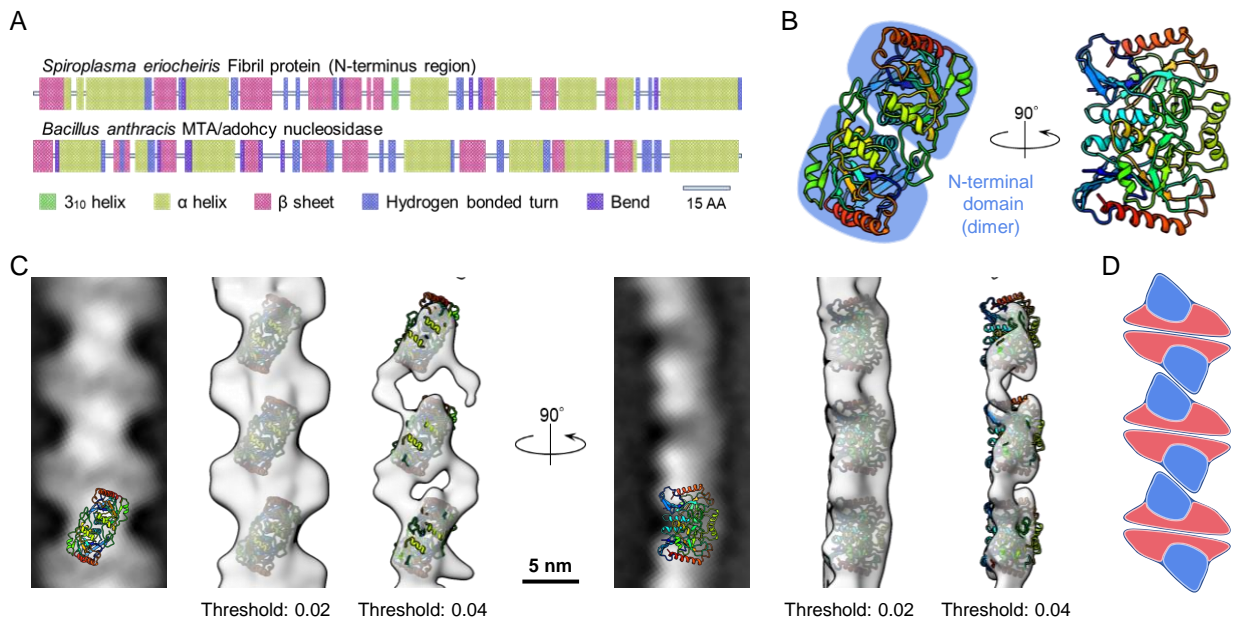

**Figure 5.** Assignment of predicted fibril protein structure to density map. (A) Comparison of the secondary structure predicted from amino acid sequences of the N-terminal region of fibril protein (upper) and methylthioadenosine/S-adenosylhomocysteine (MTA/SAH) nucleosidase of *Bacillus anthracis* (lower). (B) Predicted structure for N-terminal domain of fibril protein. The structure was predicted as a homodimer as marked by the blue background in the left image. (C) Alignment of predicted structure to density map. Two-dimensional averaged image (left in each) and fitting of N-terminal domain to density map of different thresholds (middle and right, in each) are viewed from two angles apart by 90 degrees. (D) Assignments of N-terminal (blue) and C-terminal (red) domains in the fibril filament.

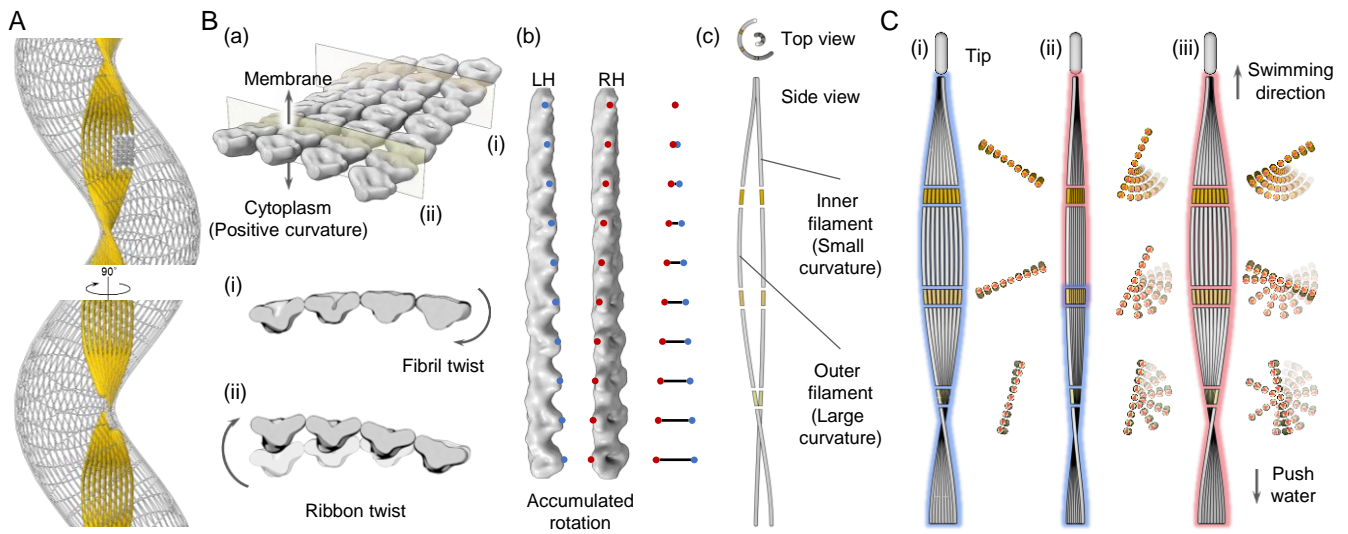

**Figure 6.** Model schematic for swimming. (A) Ribbon alignment along innermost line of helical cell body. (B) Relation between helicity of fibril filament and ribbon. (a) The ribbon comprises fibril filaments. Cross sections of the ribbon at positions (i) and (ii) are shown in lower panel. The filaments show positive curvature to the cytoplasmic side. The twists of individual fibril filaments result in the twist of the whole ribbon because the filaments bind to the neighboring filaments through their fixed positions. (b) The twist of the fibril filament accumulated through the stack of units. The horizontal positions of oval ends are shown for each unit. The positional difference of the end points is shown by lines between the red and blue dots. (c) Curvatures of the protofilament. For ribbon formation, each protofilament should take a different curvature. (C) Helix rotation caused by the accumulated twist (Movie\_S3). The whole and small stack of ribbons are presented, respectively, in left and right, for each of three conformations (i), (ii), and (iii). The ribbon is stabilized by a “Tip” at the front end. The left-handed ribbon (i), the transition state of the ribbon from left-handed to right-handed by helicity-switching, with a switch point traveling from front to back (ii), and the resultant right-handed ribbon (iii) are presented. The left-handed and right-handed areas are marked by blue and red outlines, respectively. Rotation of small stacks from conformation (i) are presented by traces with transition from light to deep colors. The twist of the ribbon accumulates with the switch traveling. The rotations caused by the accumulated twist pushes water backward, resulting in the propelling force.
